# Supplementary material for: Light assisted rechargeable batteries: a proof of concept with BODIPY derivatives acting as a combined photosensitizer and electrical storage unit
Source: Royal Society of Chemistry journal article supplement (doi:10.1039/c6ta10177a), 2016-12-21

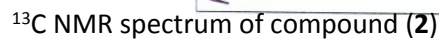

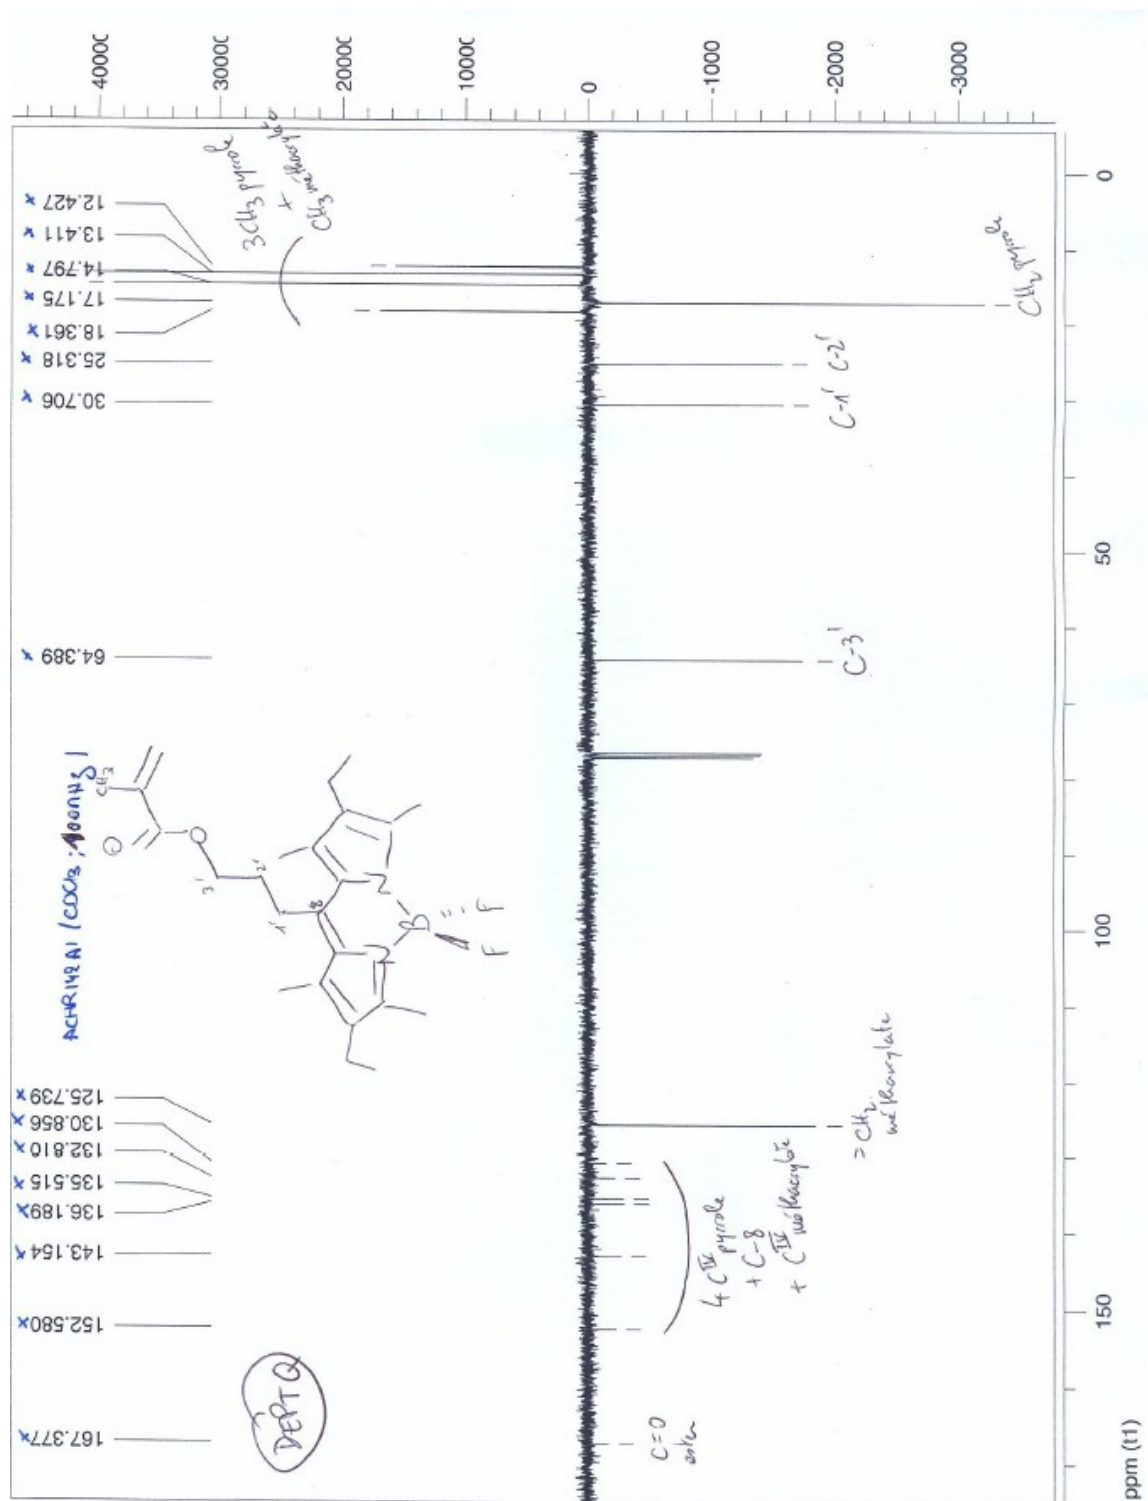

<sup>19</sup>F NMR spectrum of compound (2)

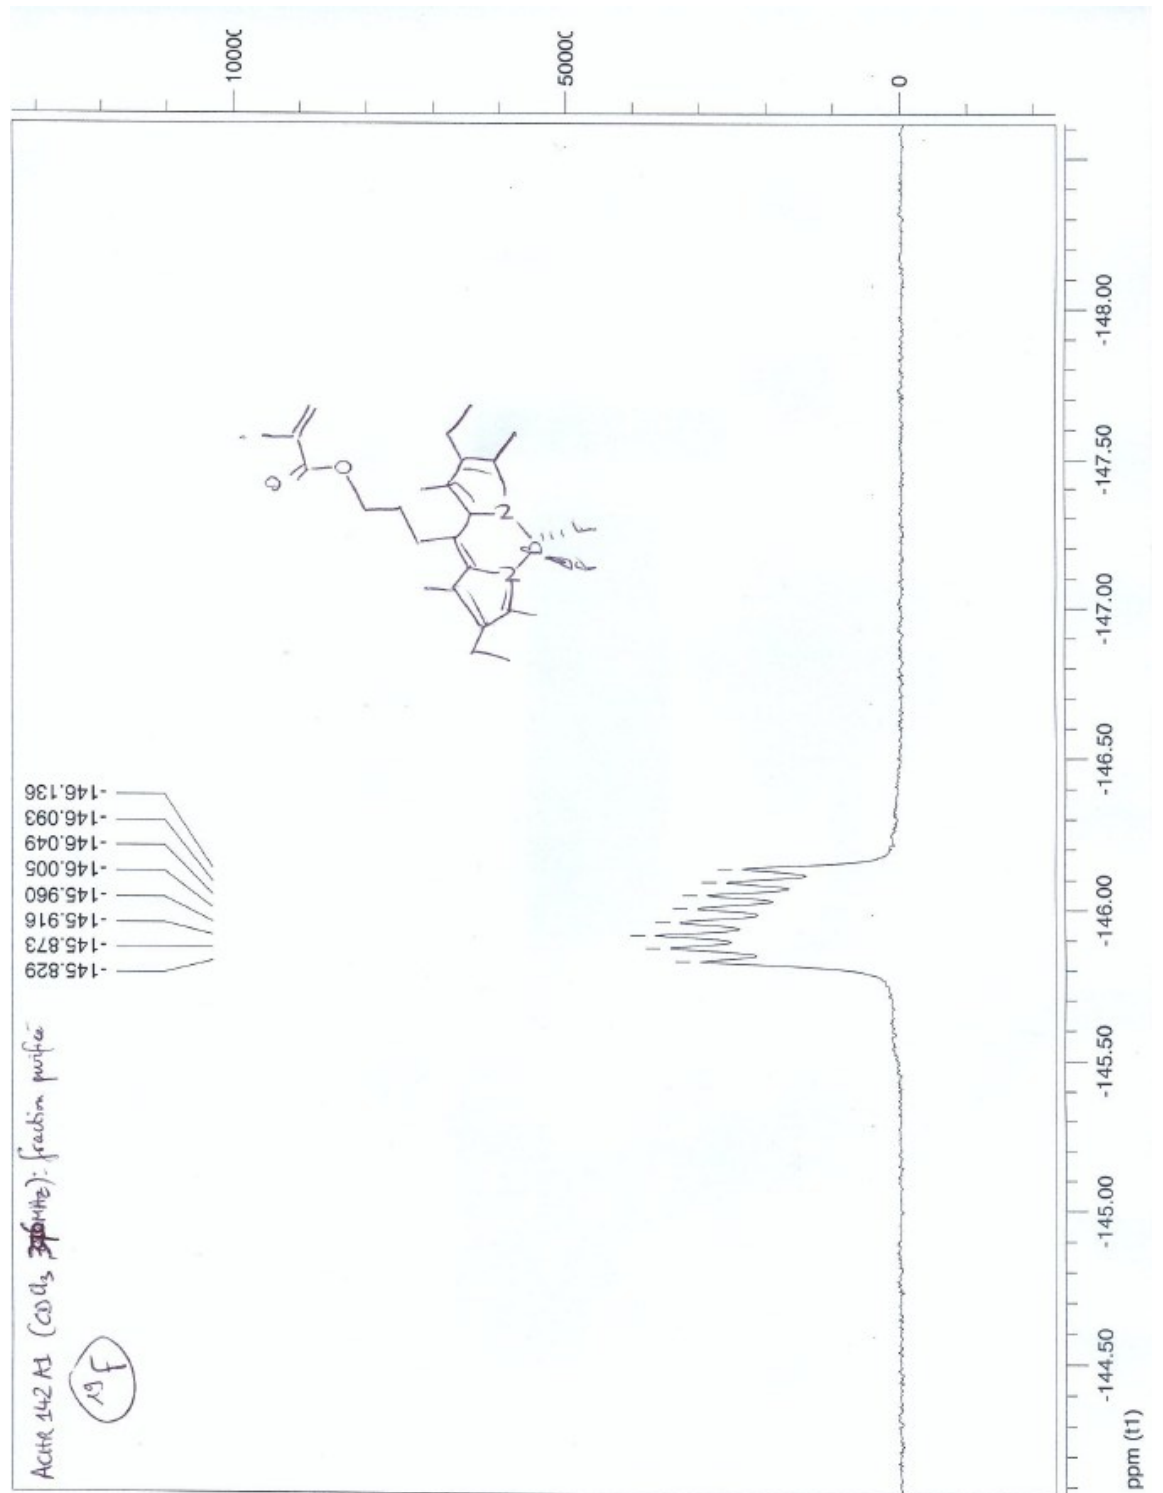

<sup>11</sup>B NMR spectrum of compound (2)

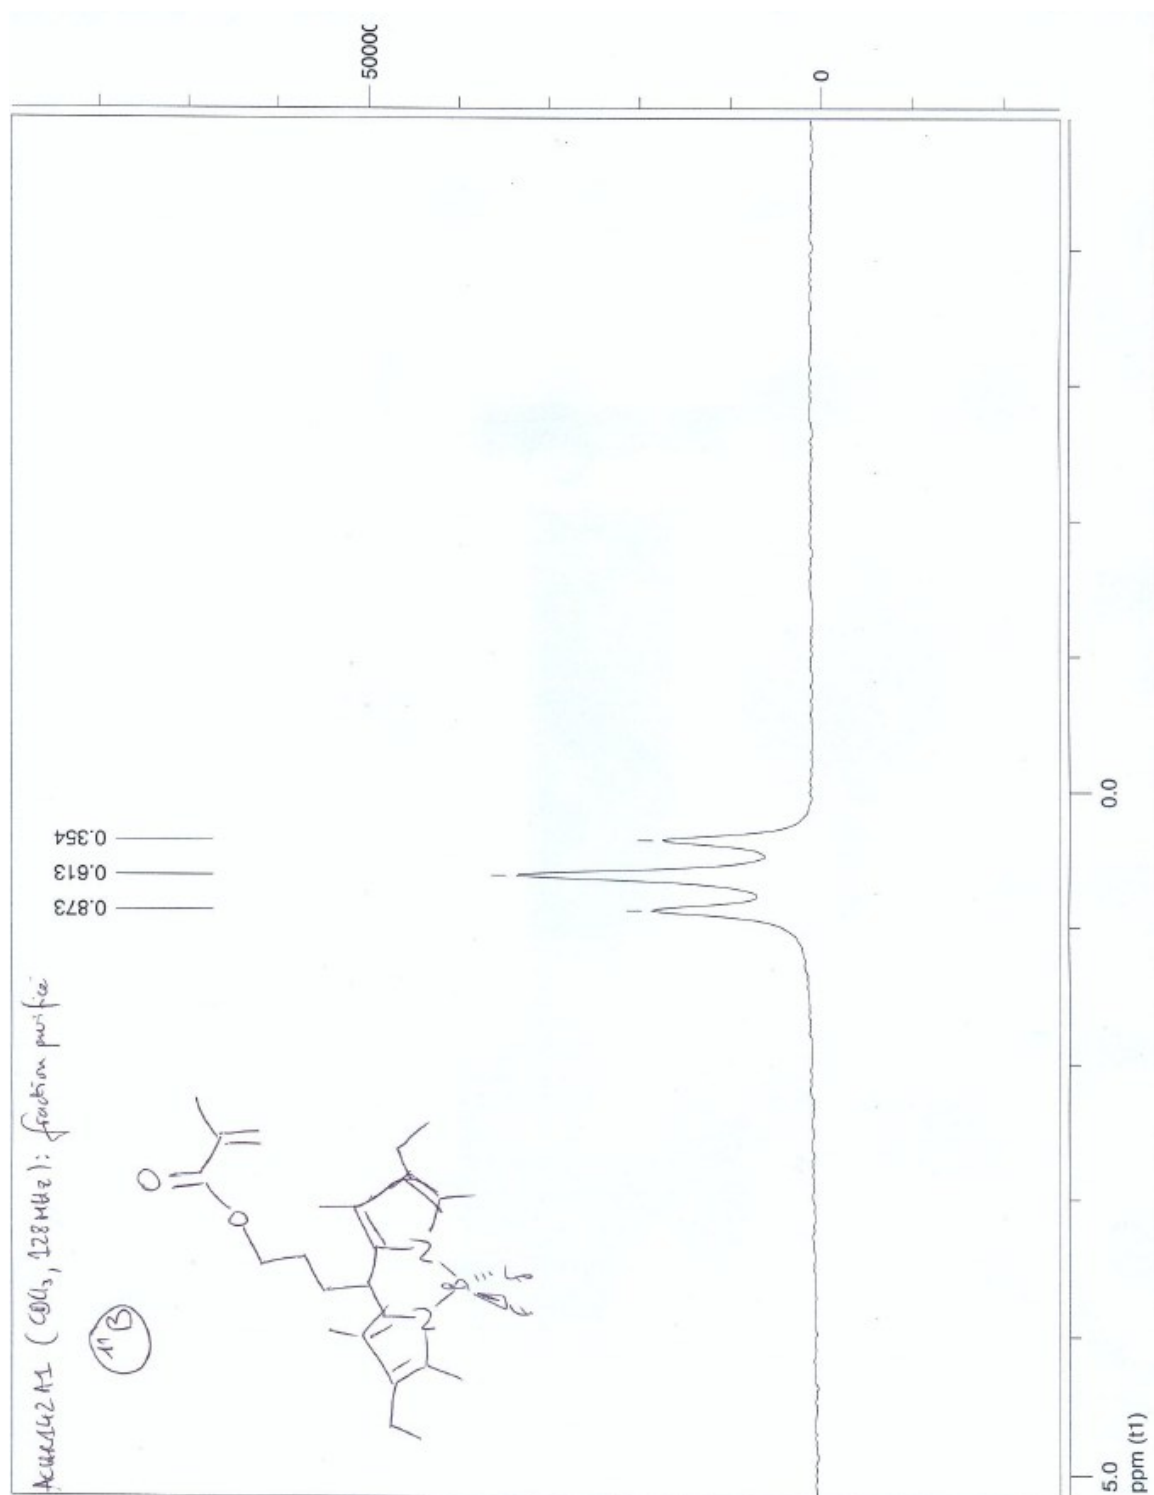

Mass spectrum of compound (2)

## Display Report

### Analysis Info

Analysis Name D:\Data\serco\Christen Aude\_21\_01\_17143.d  
Method 17143.m  
Sample Name Christen Aude  
Comment ACHR144A2(416)  
C23H31BF2N2O2  
5 10e-5 M ds CH2Cl2 dilue 5 10e-5 M ds acn

Acquisition Date 4/2/2013 4:35:01 PM

Operator Rodolphe  
Instrument esquire3000 plus

### Acquisition Parameter

|                   |              |              |            |                          |          |
|-------------------|--------------|--------------|------------|--------------------------|----------|
| Ion Source Type   | ESI          | Ion Polarity | Positive   | Alternating Ion Polarity | off      |
| Mass Range Mode   | Std/Normal   | Scan Begin   | 50 m/z     | Scan End                 | 1000 m/z |
| Capillary Exit    | 115.0 Volt   | Skim 1       | 40.0 Volt  | Trap Drive               | 52.7     |
| Accumulation Time | 1263 $\mu$ s | Averages     | 20 Spectra | Auto MS/MS               | off      |

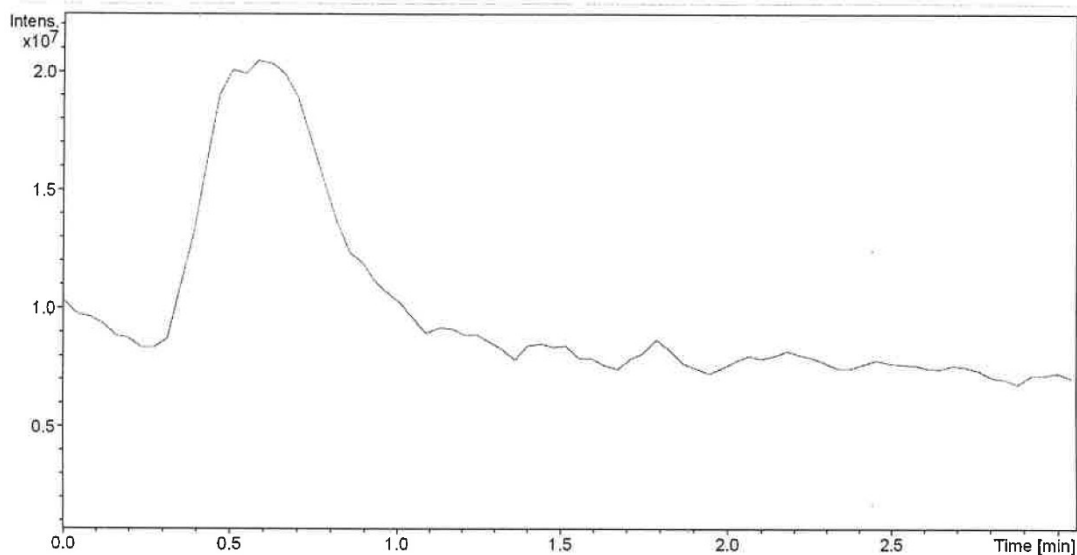

— TIC +All MS

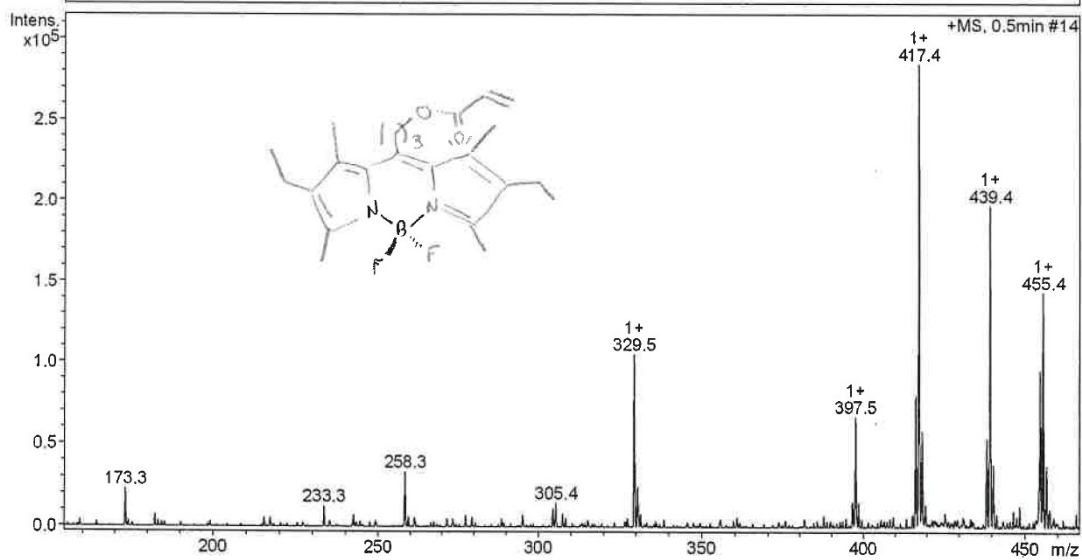

Supplement: c6ta10177a2.pdf [file c6ta10177a2.pdf]
